# Supplementary material
Source: Springer Nature journal article supplement (https://www.springermedizin.de/resource/supplementary/13054_2012_702_MOESM3_ESM.pdf/9709070)

# group1 versus group4

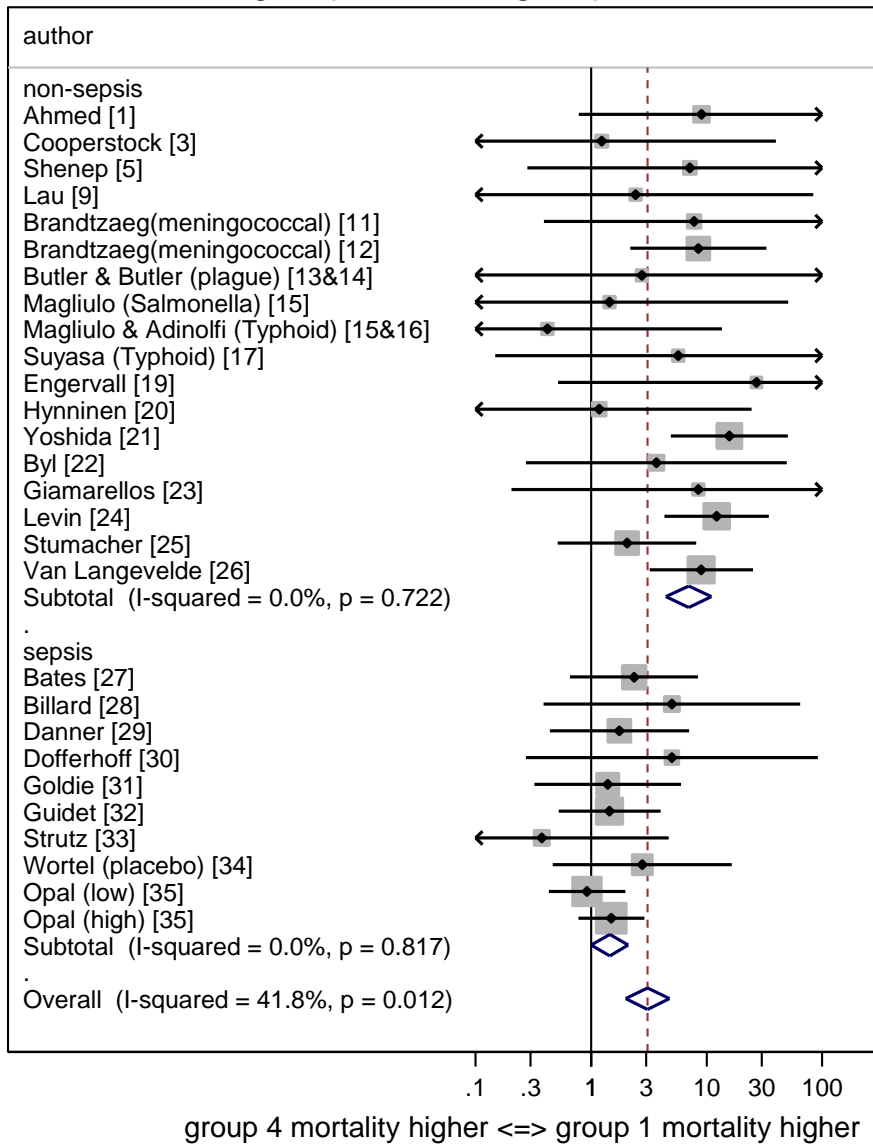

Supplement: MOESM3 [file 9709070]
